# Supplementary material for: Control of hepatic gluconeogenesis by Argonaute2
Source: PubMed Central journal article supplement — Mol Metab. 2018 Oct 9;18:15–24. doi: 10.1016/j.molmet.2018.10.003 (PMC6308973; doi:10.1016/j.molmet.2018.10.003), 2018-10-09
Supplement: mmc1.pdf [file mmc1.pdf]

```

+1620                                     +1640
Mouse  5'...AGUUUAUGCACUGAUUUCGG...3'
+2063                                     +2083
Human  5'...GAAUCAUGCACUGAAUUCAAA...3'
(Consensus) 5'...GAAACAUGCACUGAAUUCAAA...3'
                |||||
3'...UUUCAAGACAUCACGUGACU...5' miR-148a-3p

```

Supplementary Figure1. Predicted binding site of miR-148a in the 3'UTR of AMPK $\alpha$ 1
